# Supplementary material for: New insights into addition reactions of dialkylzinc reagents to trifluoromethyl ketones: Structural authentication of a β-hydride elimination product containing a tetranuclear zinc chain
Source: Royal Society of Chemistry journal article supplement (doi:10.1039/b911818g), 2009-09-15

## New Insights into Addition Reactions of Dialkylzinc Reagents to Trifluoromethyl Ketones: Structural Authentication of a $\beta$ -hydride Elimination Product Containing a Tetranuclear Zinc Chain.

Eva Hevia,\* Alan R. Kennedy, Jan Klett, Zoe Livingstone, and Matthew D. McCall

*WestCHEM, Department of Pure and Applied Chemistry, University of Strathclyde, Glasgow, UK, G1 1XL. E-mail: [eva.hevia@strath.ac.uk](mailto:eva.hevia@strath.ac.uk)*

### NMR spectra

Variable T  $^1\text{H}$  NMR spectra of  $[(\text{TMEDA})\text{Zn}(\text{Me})\{\text{OC}(\text{CF}_3)(\text{Me})\text{Ph}\}]$  (**2**) in deuterated toluene. (Black =  $-35^\circ\text{C}$ ; Red =  $25^\circ\text{C}$ ; Blue =  $80^\circ\text{C}$ )

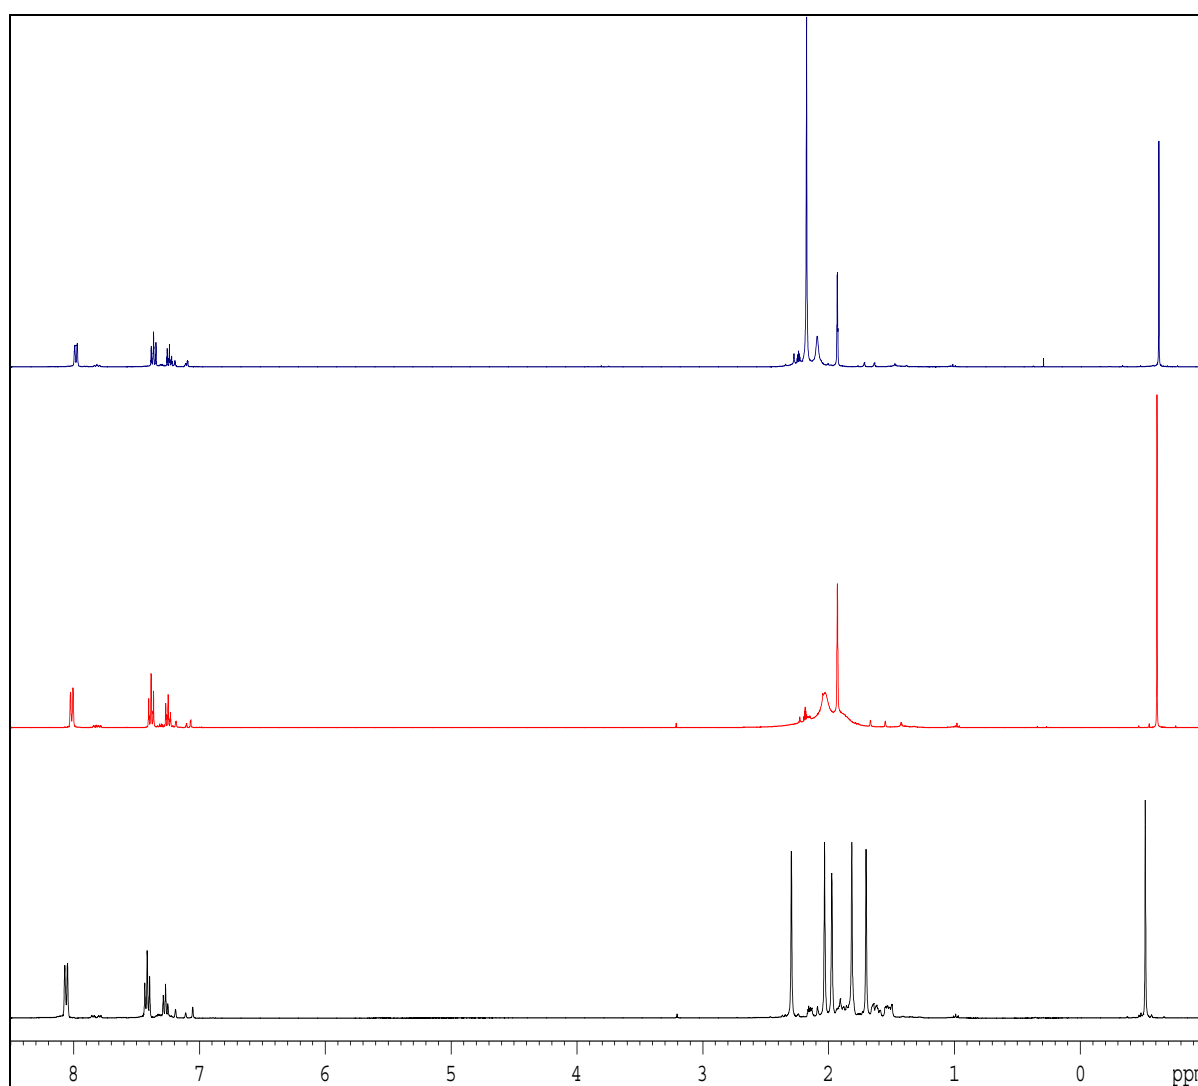

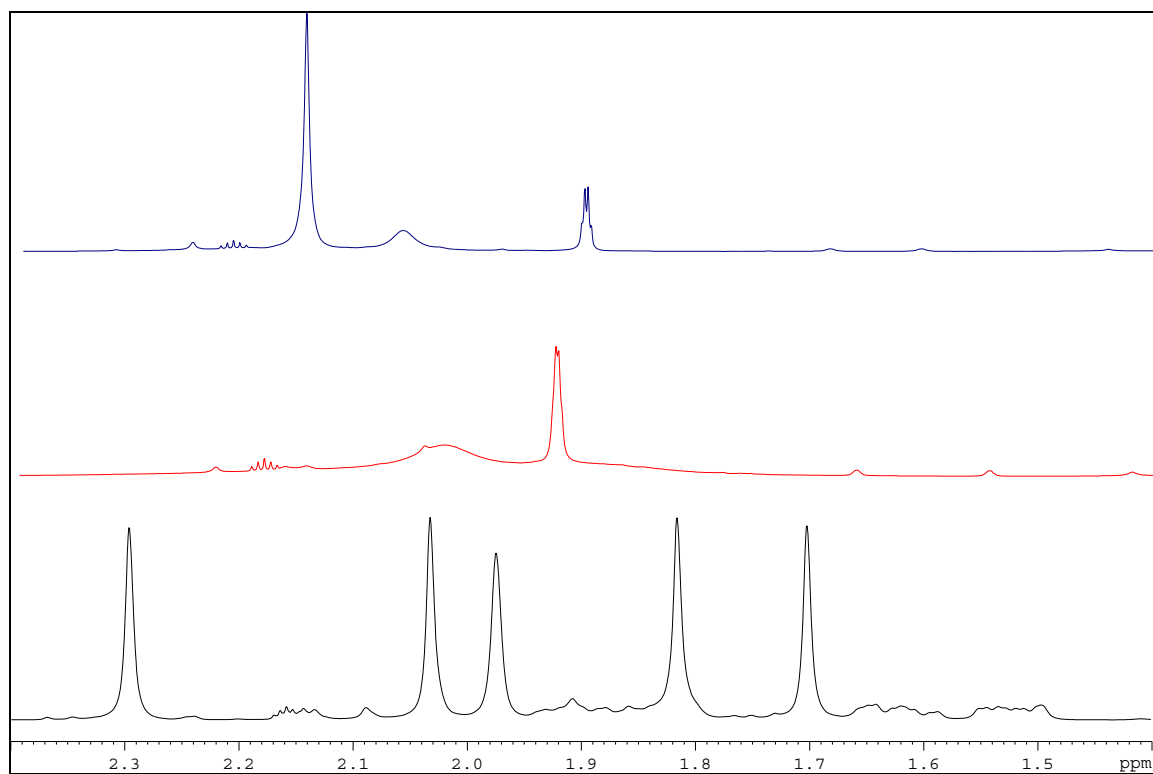

$^1\text{H}$  NMR of isolated crystals of  $[(^t\text{Bu})_2\text{Zn}_4\{\text{OC}(\text{CF}_3)(\text{H})\text{Ph}\}]$  (**5**) in  $\text{C}_6\text{D}_6$ .

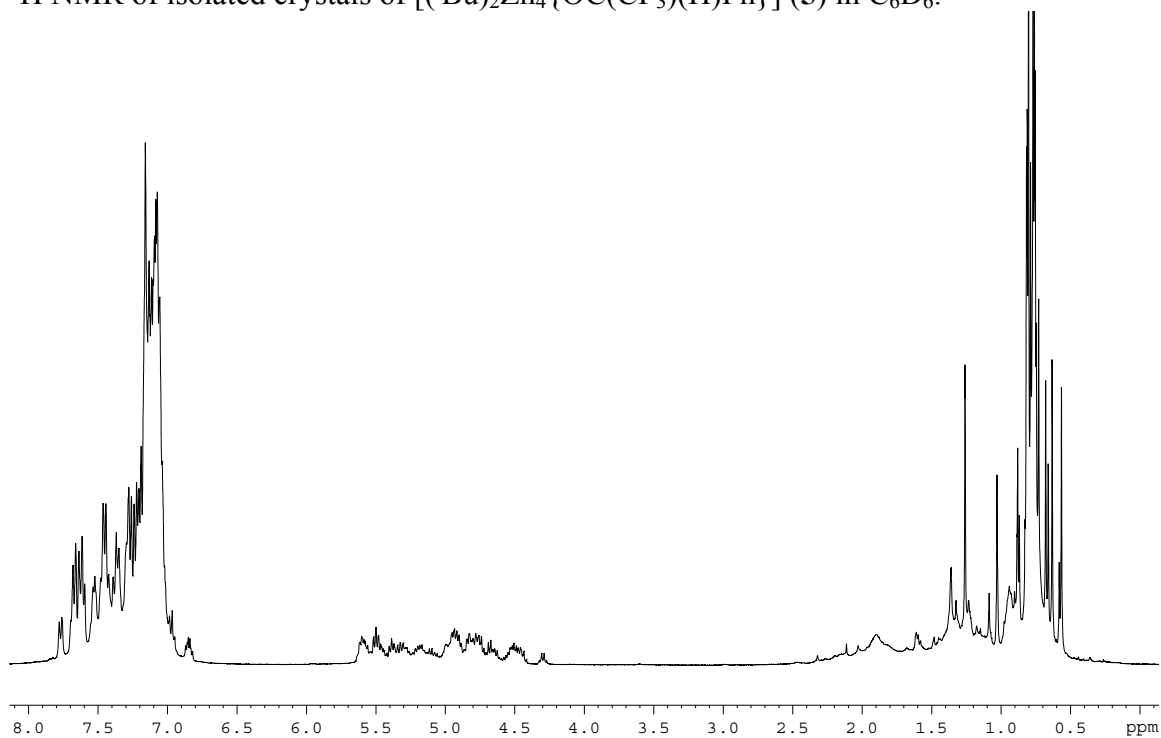

$^{19}\text{F}\{^1\text{H}\}$  NMR of isolated crystals of  $[(^t\text{Bu})_2\text{Zn}_4\{\text{OC}(\text{CF}_3)(\text{H})\text{Ph}\}]$  (**5**) in  $\text{C}_6\text{D}_6$ .

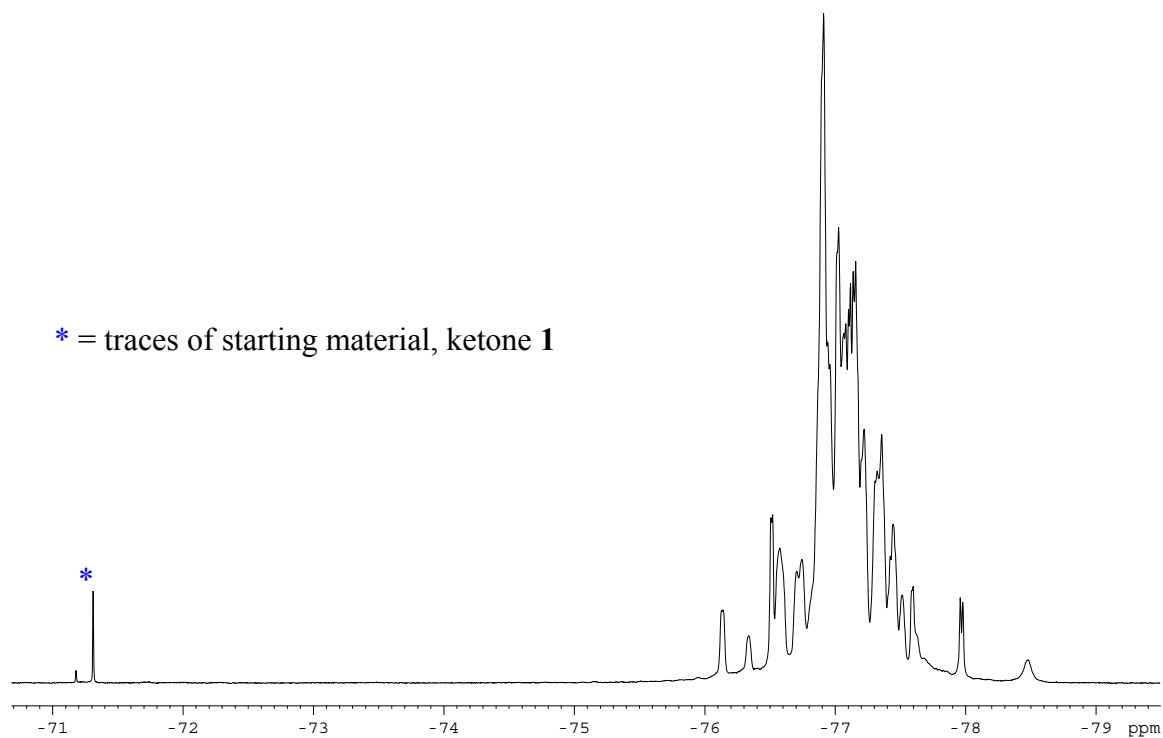

$^1\text{H}$  NMR of quenched product (crude), alcohol  $\text{PhC}(\text{H})(\text{CF}_3)\text{OH}$  (**6**) in  $\text{C}_6\text{D}_6$ <sup>1</sup>

---

1. This  $^1\text{H}$  NMR spectrum relates to a sample obtained by the treatment of isolated crystals of  $[(\text{TMEDA})\text{Zn}(^t\text{Bu})\{\text{OC}(\text{H})\text{Ph}(\text{CF}_3)\}]$  (**4**) with a saturated aqueous solution of  $\text{NH}_4\text{Cl}$ , which explains the presence of small amounts of TMEDA as an impurity in this crude NMR spectrum.

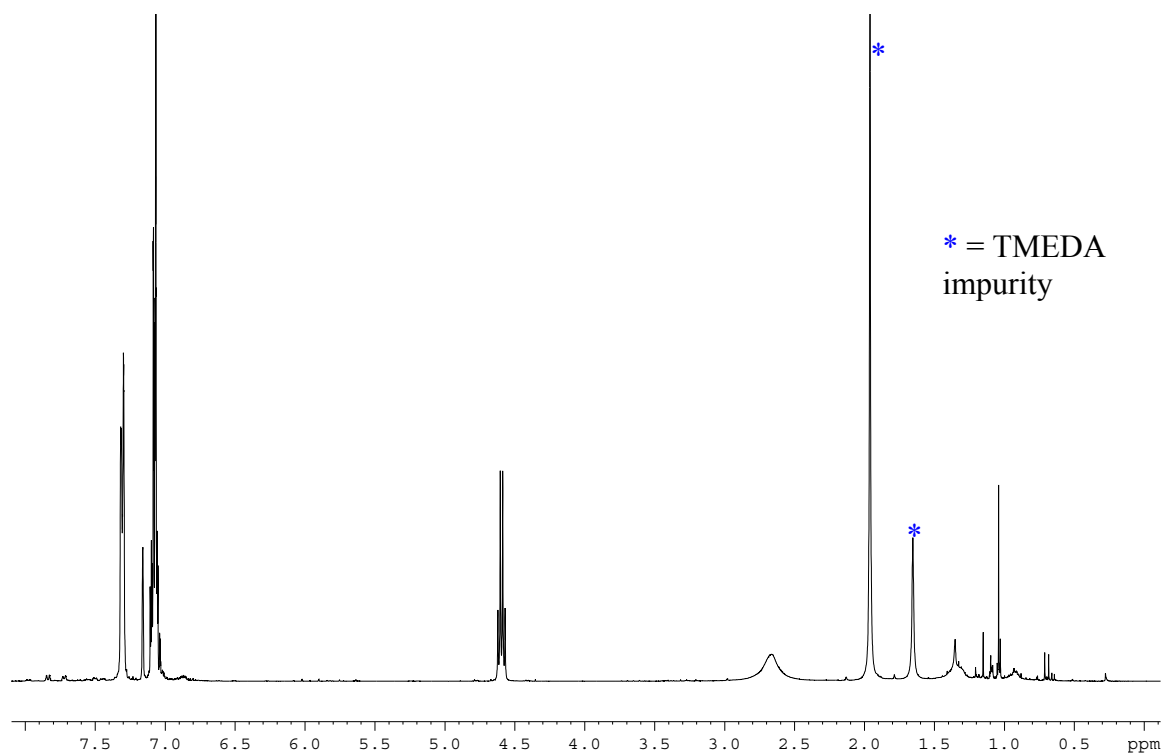

$^{19}\text{F}\{^1\text{H}\}$  NMR of quenched product, alcohol  $\text{PhC}(\text{H})(\text{CF}_3)\text{OH}$  (**6**) in  $\text{C}_6\text{D}_6$ .

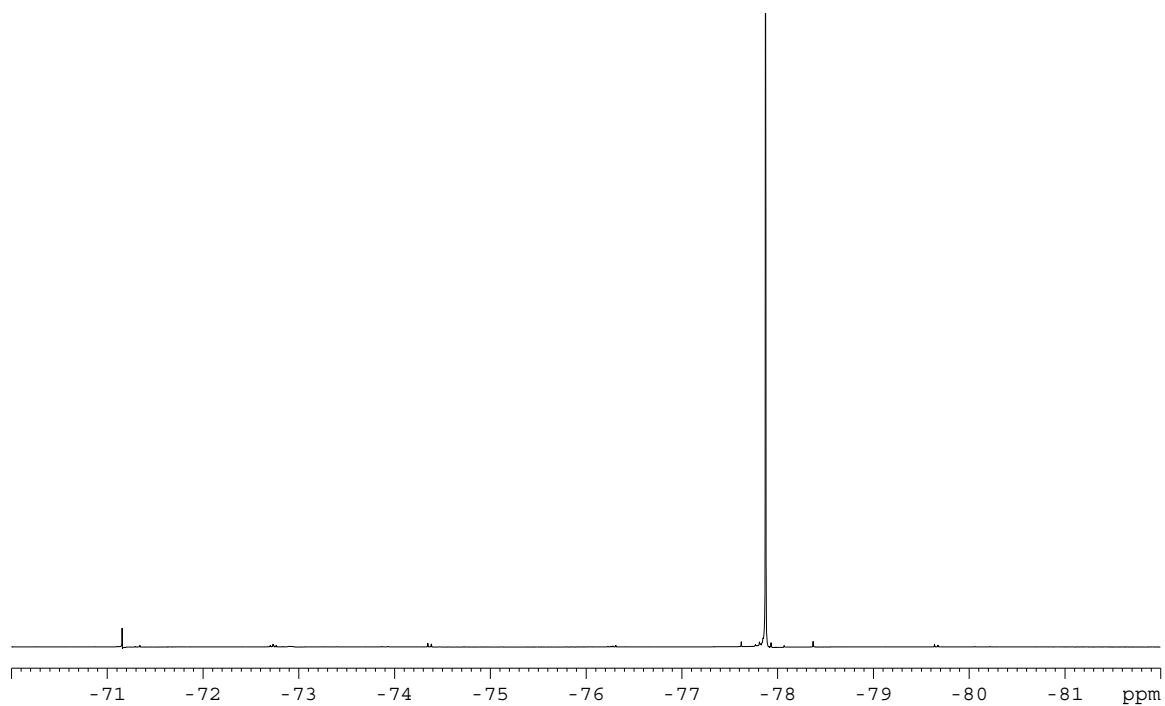

Supplement: b911818g.pdf [file b911818g.pdf]
